# Supplementary material for: Pharmacogenetic Analysis of Voriconazole Treatment in Children
Source: MDPI journal article supplement (doi:10.3390/pharmaceutics14061289), 2022-06-17
Supplement: s1 [file s1]

# Pharmacogenetic Analysis of Voriconazole Treatment in Children

Romy Tilen <sup>1,2</sup>, Paolo Paioni <sup>1</sup>, Aljoscha N. Goetschi <sup>3</sup>, Roland Goers <sup>2</sup>, Isabell Seibert <sup>2</sup>, Daniel Müller <sup>4</sup>, Julia A. Bielicki <sup>5</sup>, Christoph Berger <sup>1</sup>, Stefanie D. Krämer <sup>3</sup> and Henriette E. Meyer zu Schwabedissen <sup>2</sup>

- <sup>1</sup> Division of Infectious Diseases and Hospital Epidemiology, University Children's Hospital Zurich, Steinwiesstrasse 75, 8032 Zurich, Switzerland; romy.tilen@kispi.uzh.ch (R.T.); paolo.paioni@kispi.uzh.ch (P.P.); christoph.berger@kispi.uzh.ch (C.B.)
- <sup>2</sup> Biopharmacy, Department Pharmaceutical Sciences, University Basel, Klingelbergstrasse 50, 4056 Basel, Switzerland; romy.tilen@unibas.ch (R.T.); roland.goers@unibas.ch (R.G.); isabell.seibert@unibas.ch (I.S.); h.meyerschwabedissen@unibas.ch (H.E.M.z.S.)
- <sup>3</sup> Biopharmacy, Institute of Pharmaceutical Sciences, Department of Chemistry and Applied Biosciences, ETH Zurich, Vladimir-Prelog-Weg 4, 8093 Zurich, Switzerland; goetscha@student.ethz.ch (A.N.G.); stefanie.kraemer@pharma.ethz.ch (S.D.K.)
- <sup>4</sup> Institute of Clinical Chemistry, University Hospital Zurich, Rämistr. 100, 8091 Zurich, Switzerland; daniel.mueller@usz.ch (D.M.)
- <sup>5</sup> Paediatric Research Centre, University Children's Hospital Basel, Basel, Spitalstrasse 33, 4056 Basel, Switzerland; juliaannabelicki@ukbb.ch (J.A.B.)
- \* Correspondence: romy.tilen@kispi.ch (R.T.); h.meyerschwabedissen@unibas.ch (H.E.M.z.S.)

## Supplementary Information

## Supplementary Figures

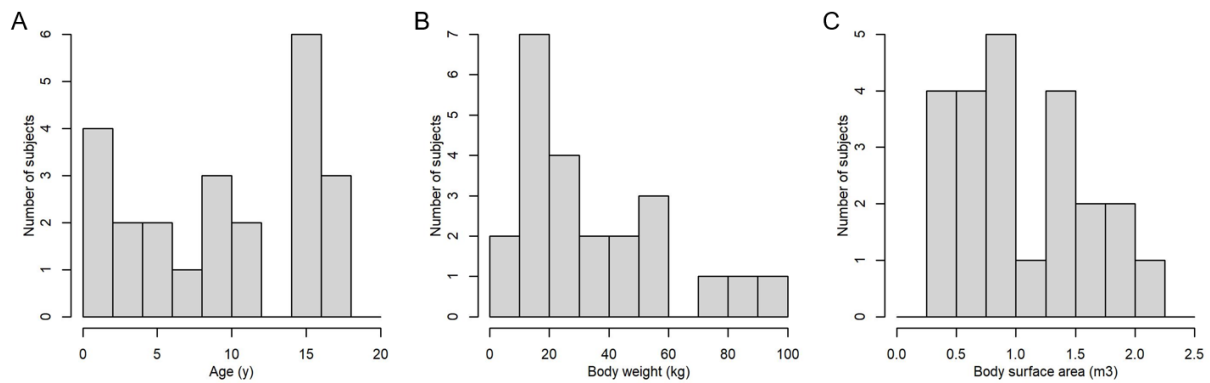

**Figure S1.** Demographic characteristics of the sub-population with information on genetic polymorphisms, analyzed by linear mixed effects modelling. Distribution for age (A), body weight (B) and body surface area (C).

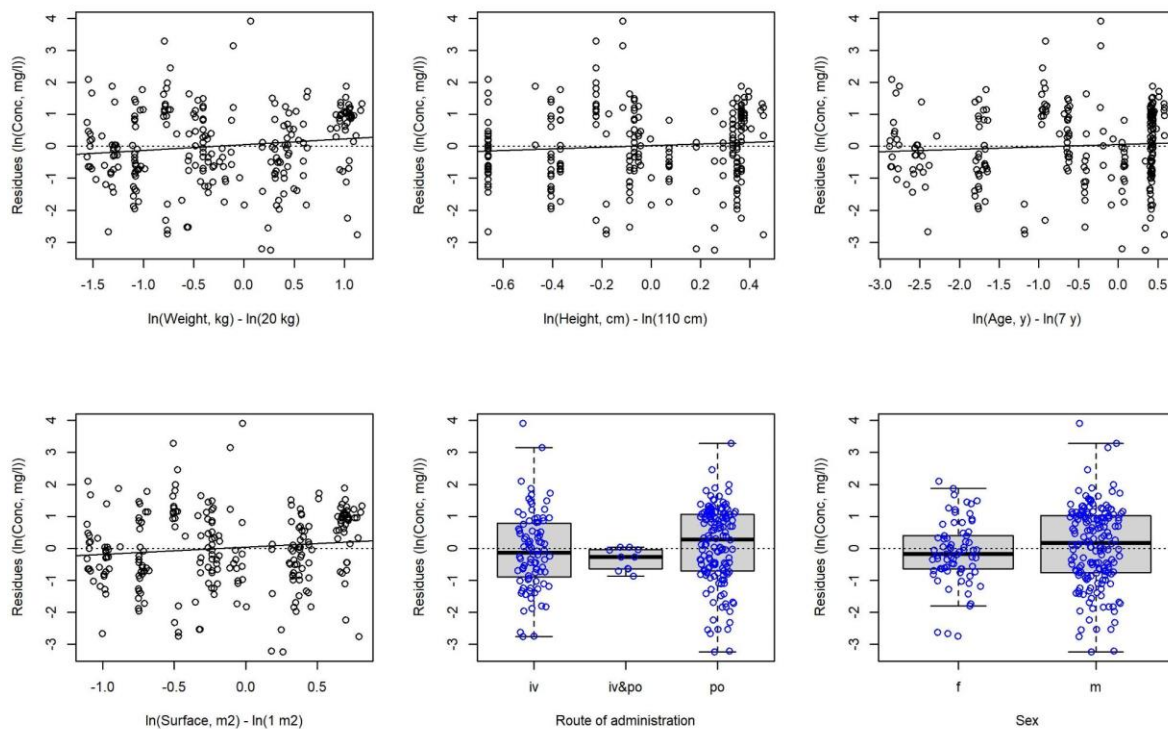

**Figure S2.** Residues (observed  $\ln(C_{trough})$  minus simulated  $\ln(C_{trough})$ ) plotted against demographic parameters as indicated after including dose per body weight and body surface area as covariates in the model.

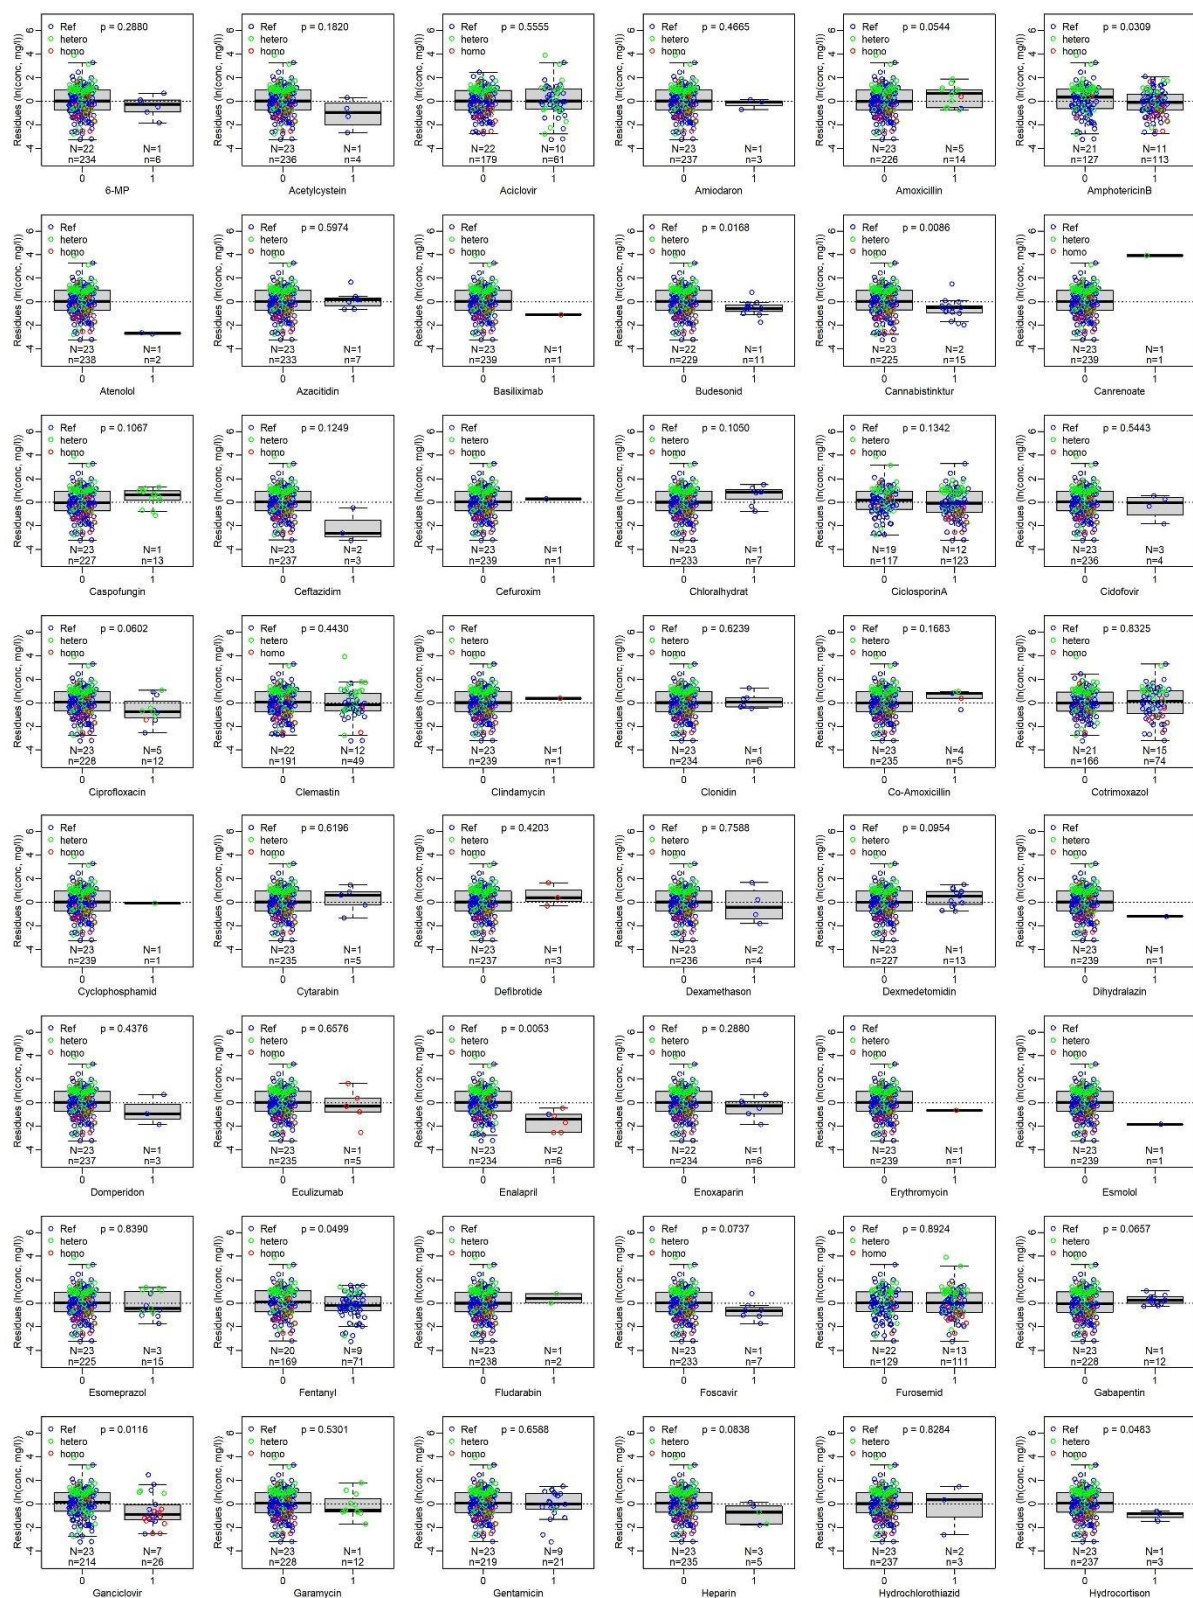

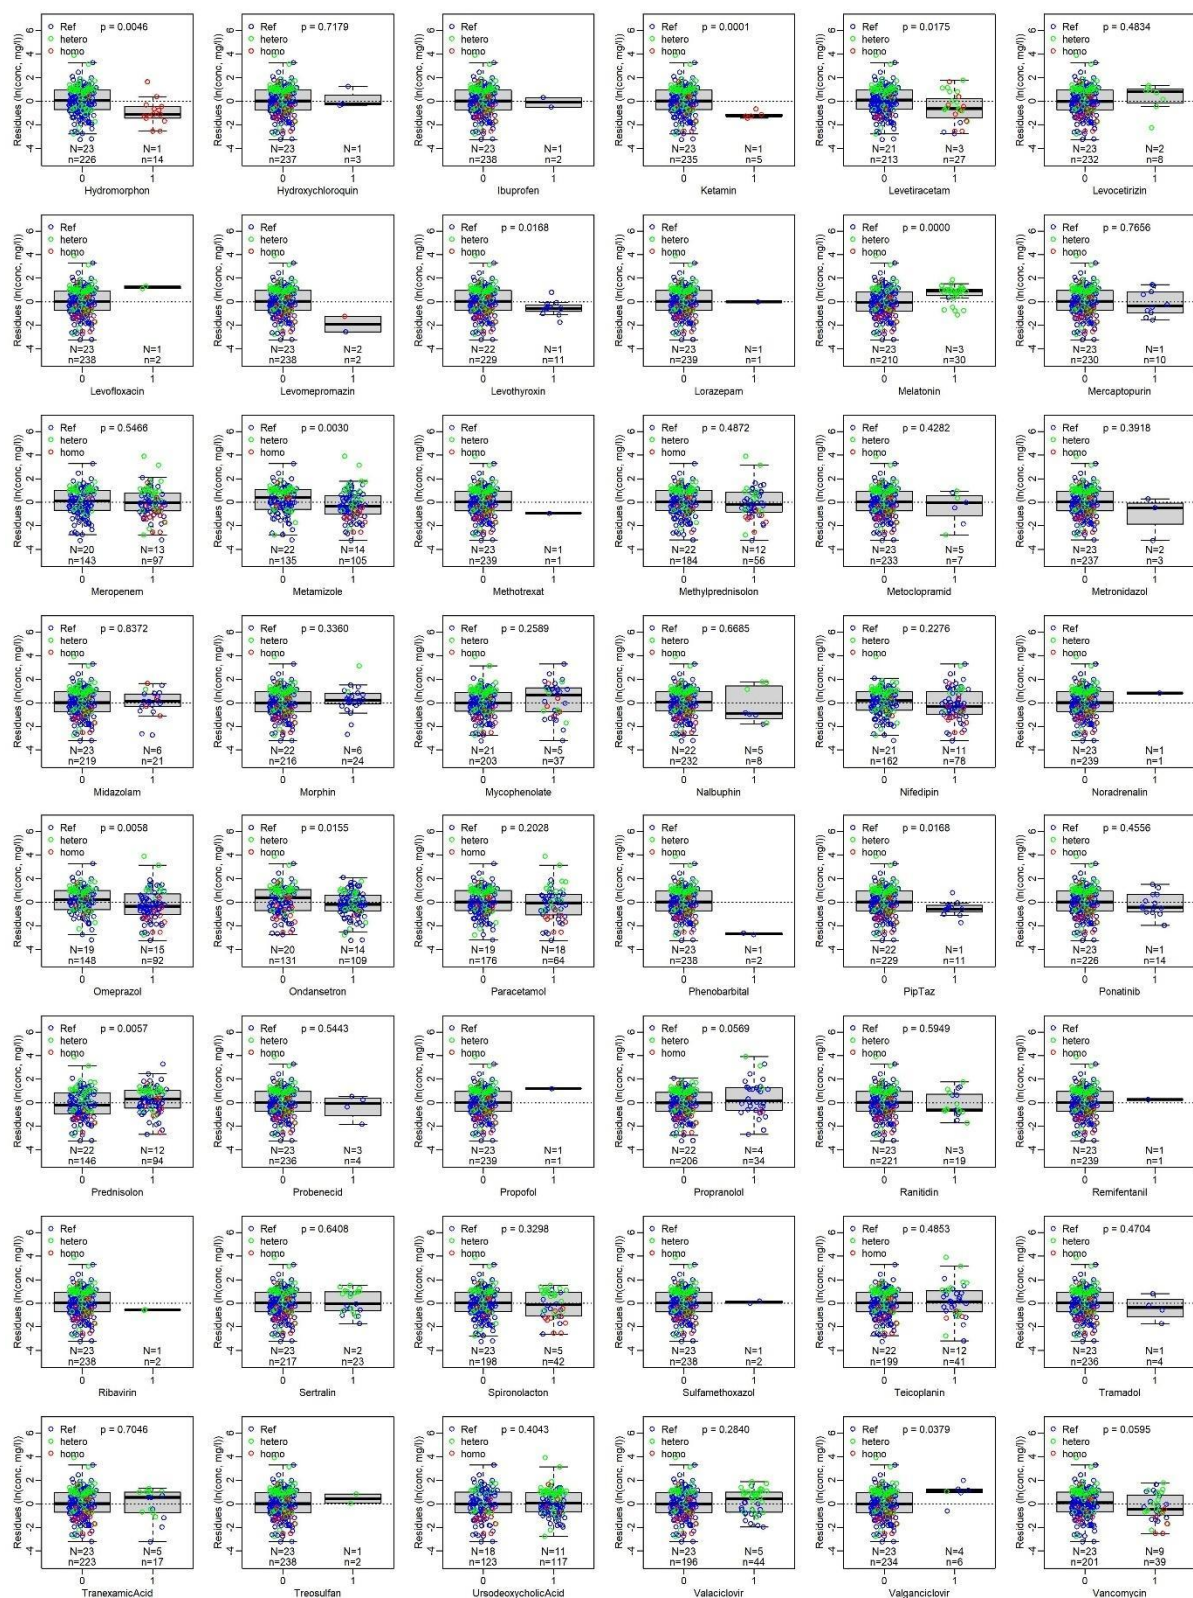

**Figure S3.** Residues plotted against co-medication as indicated after including dose per body weight and body surface area as covariates in the model. 0, 1 on x-axis, no / with co-medication. N, number of patients in a group; n, number of  $C_{trough}$  measurements in a group; p, p value of a two-tailed, homoscedastic student's *t*-test. Blue symbols, CYP2C19 rs4244285 GG reference genotype; green symbols, GA; red symbols AA genotype. Plots were prepared for each polymorphic gene and data inspected to identify potential covariates.



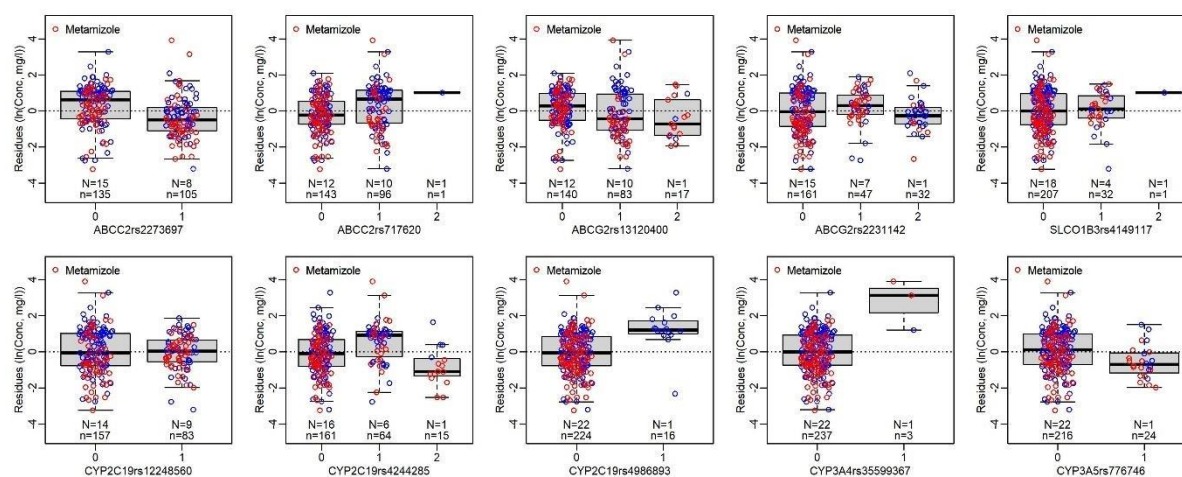

**Figure S4.** Residues plotted against gene variants as indicated after including dose per body weight and body surface area as covariates in the model. 0, 1, 2 on the x-axis, number of variant alleles in a genotype (0, reference; 1, heterozygous; 2, homozygous for the variant). Blue, without co-medication with the indicated drug (metamizole in the example figure); red, with comedication with the indicated drug. Plots were prepared for each individual co-medicated drug and inspected for potential covariates and finally potential drug $\times$ gene interactions.

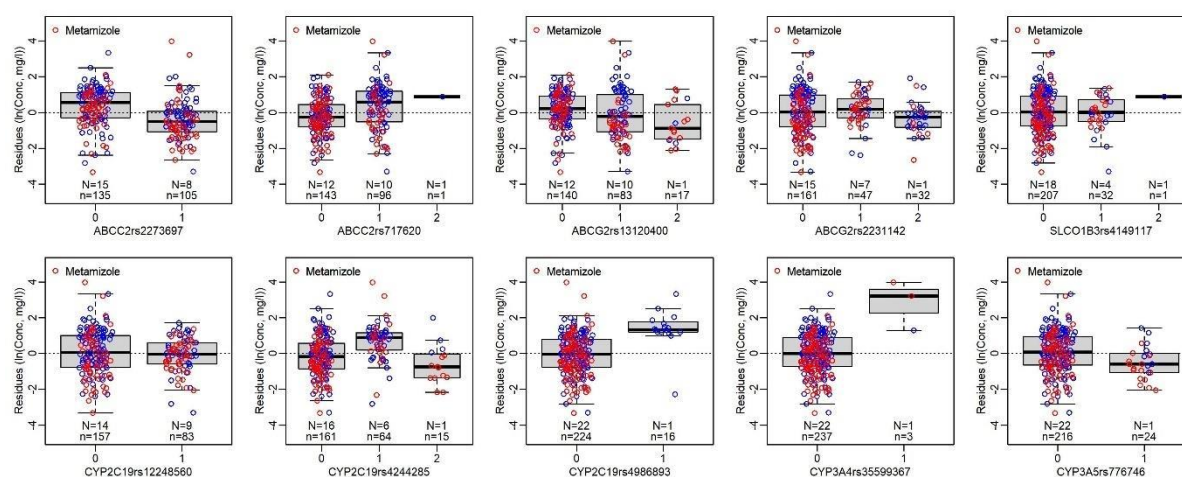

**Figure S5.** Residues plotted as in Supplementary Figure S4, but including co-medication with ciprofloxacin, levetiracetam and propranolol as covariates.

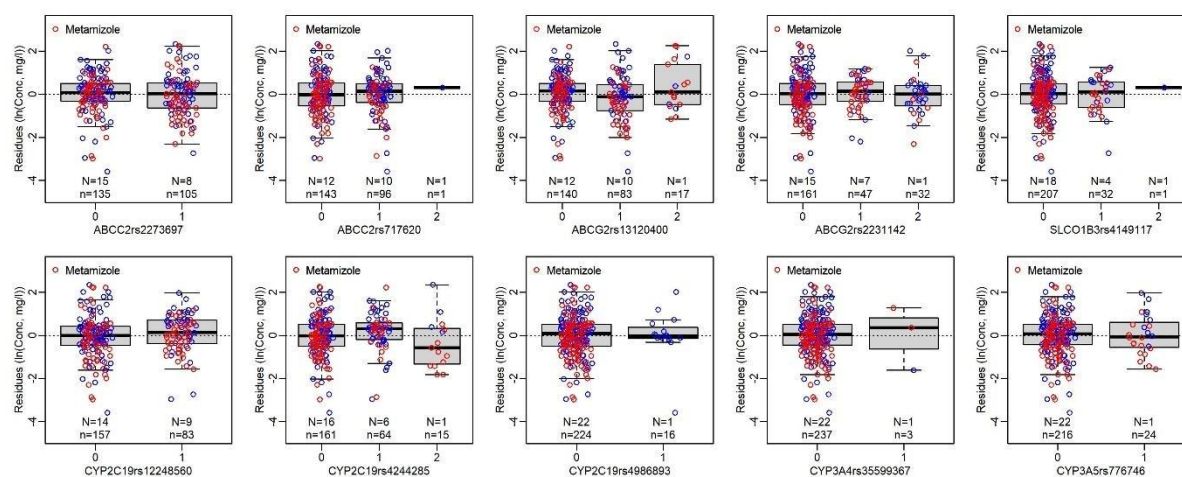

**Figure S6.** As Supplementary Figure S5, but in addition including the significant effects of the genetic variants in the model.

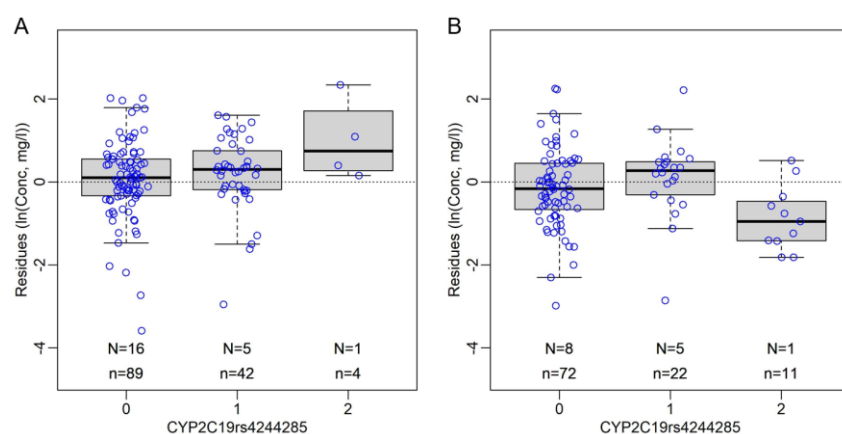

**Figure S7.** Residuals shown in Figure S6 plotted *versus* the CYP2C19 rs4244285 genotype. **A)**  $C_{\text{trough}}$  without metamizole co-medication. **B)**  $C_{\text{trough}}$  measured after metamizole co-medication. 0, 1, 2, number of variant alleles. Note that the data for the AA genotype (2 variant alleles) is from the same patient, without and with co-medication with metamizole.

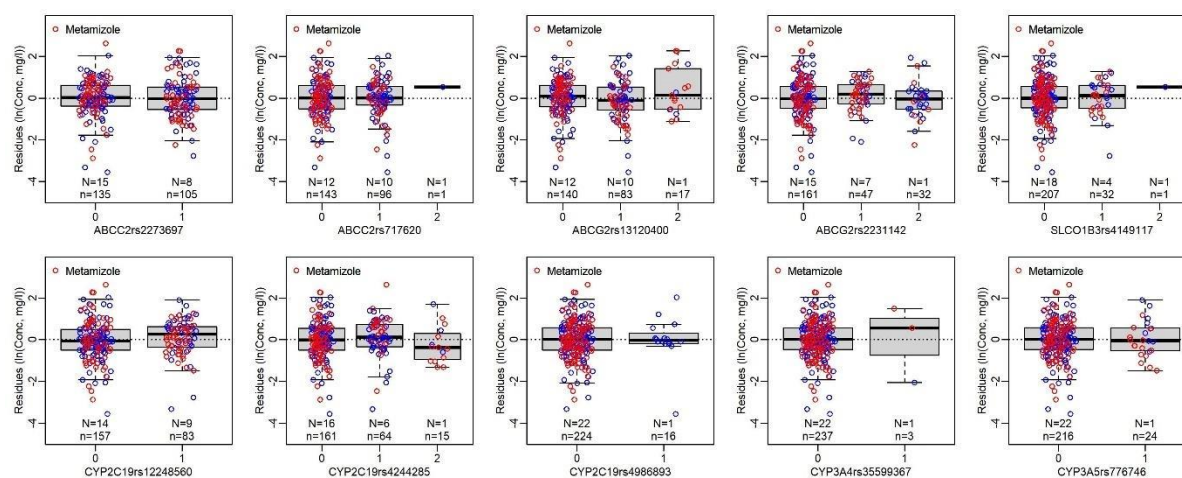

**Figure S8.** As Supplementary Figure S6, but for the final model, including the interaction term metamizole×CYP2C19 rs4244285 in the model.

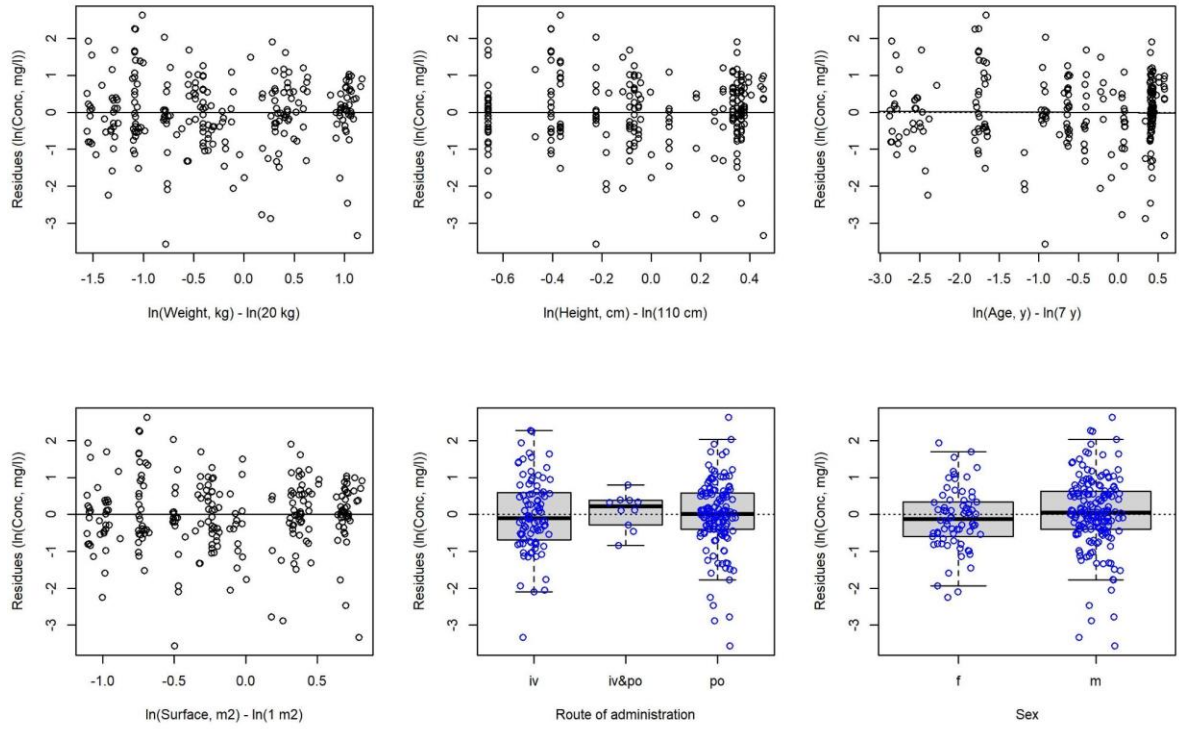

**Figure S9.** Residues from the final model plotted *versus* demographic parameters.

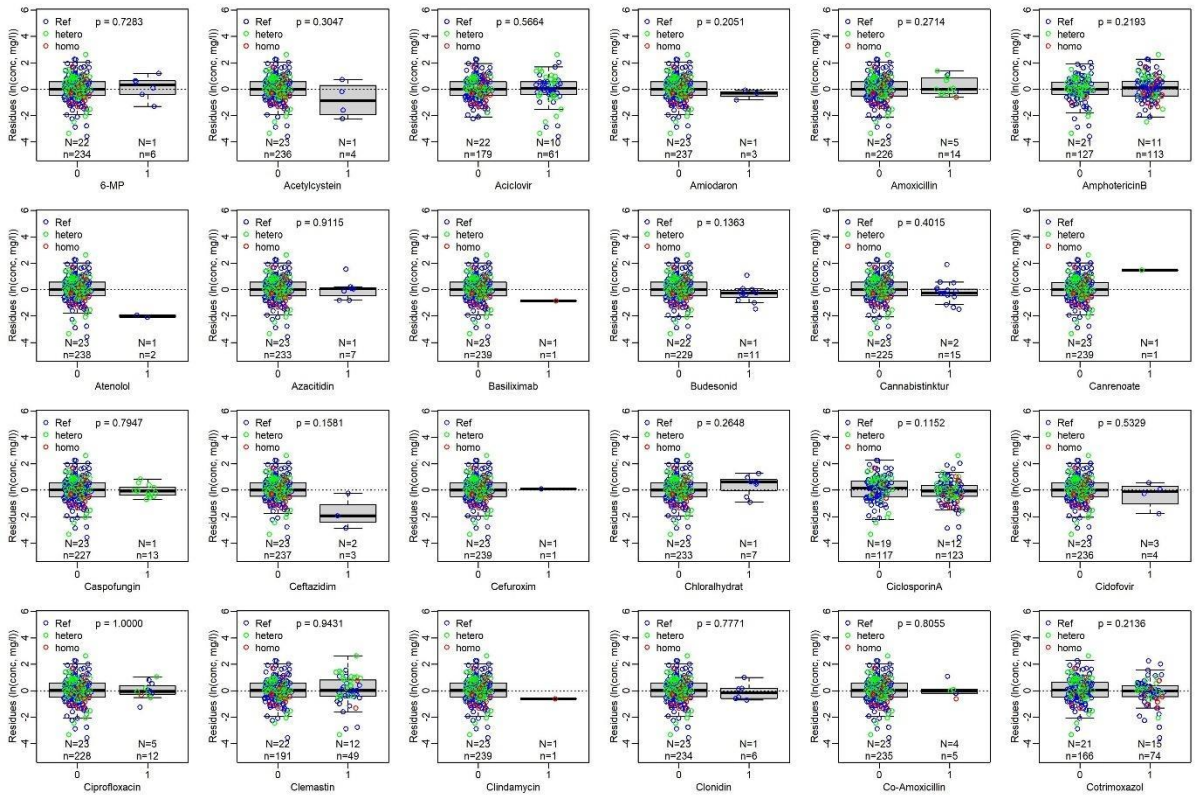



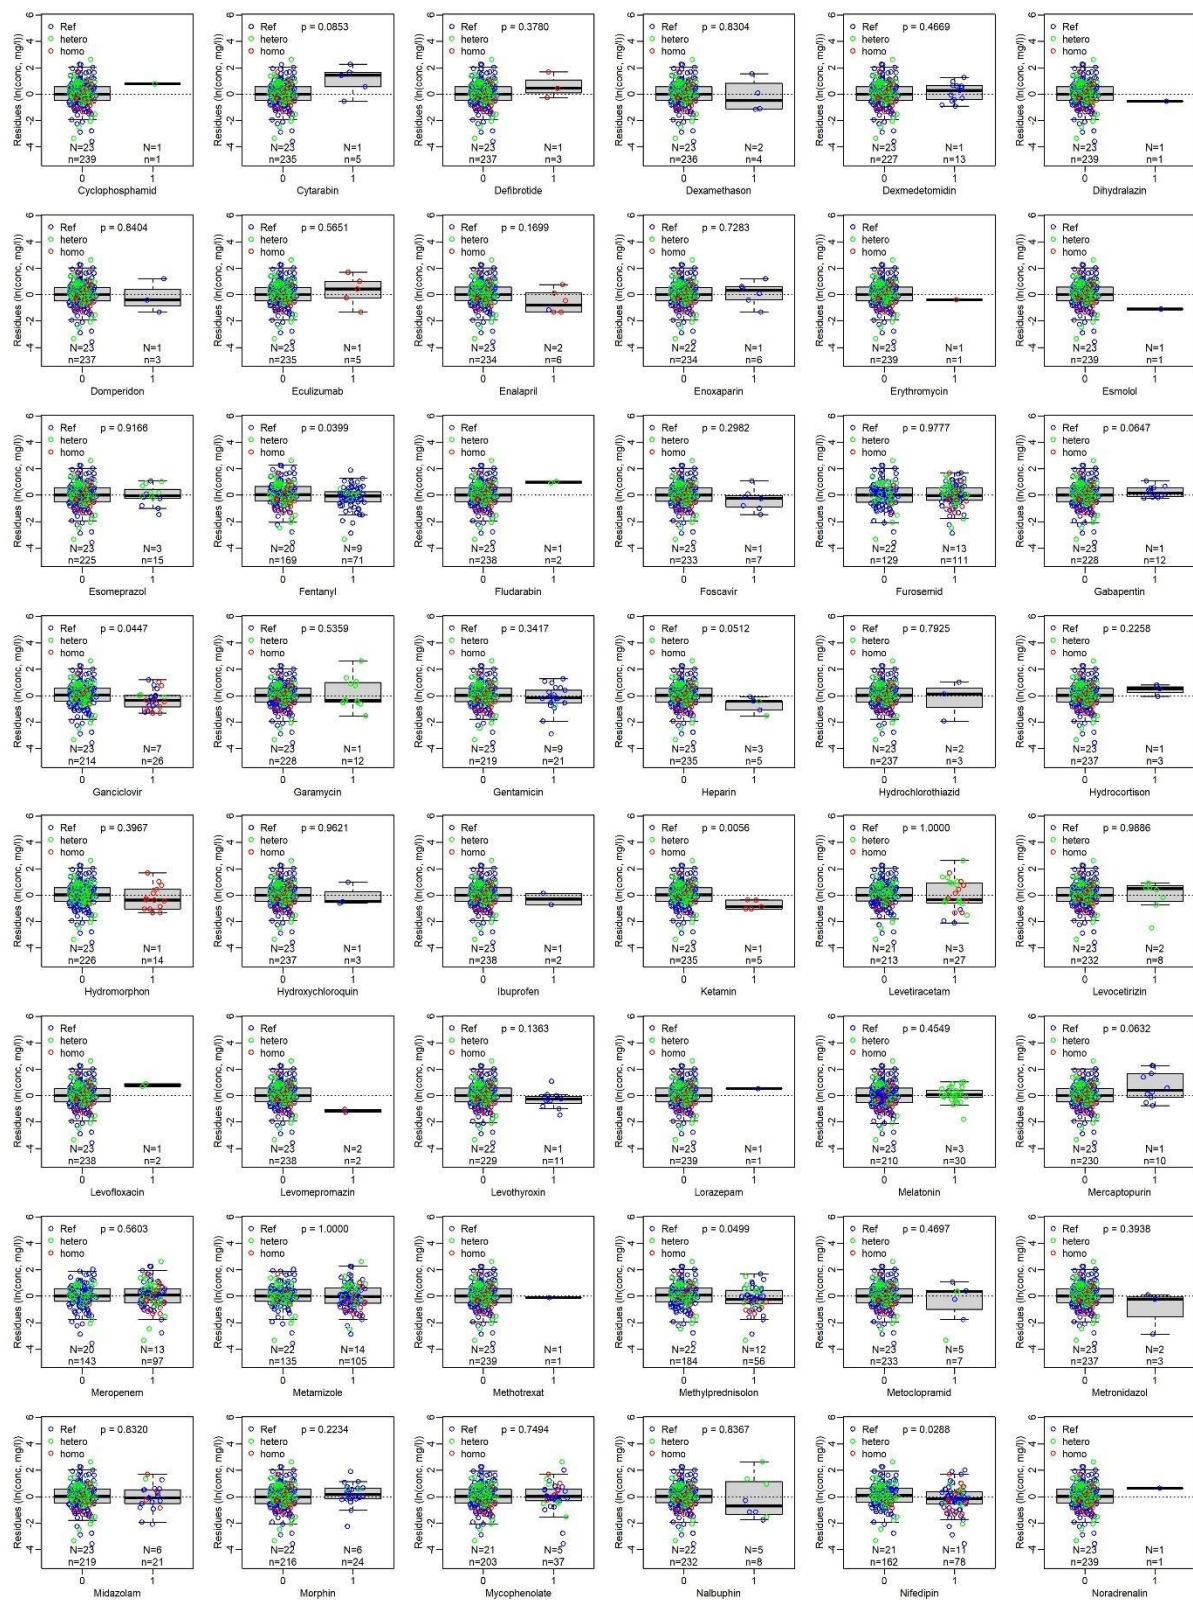



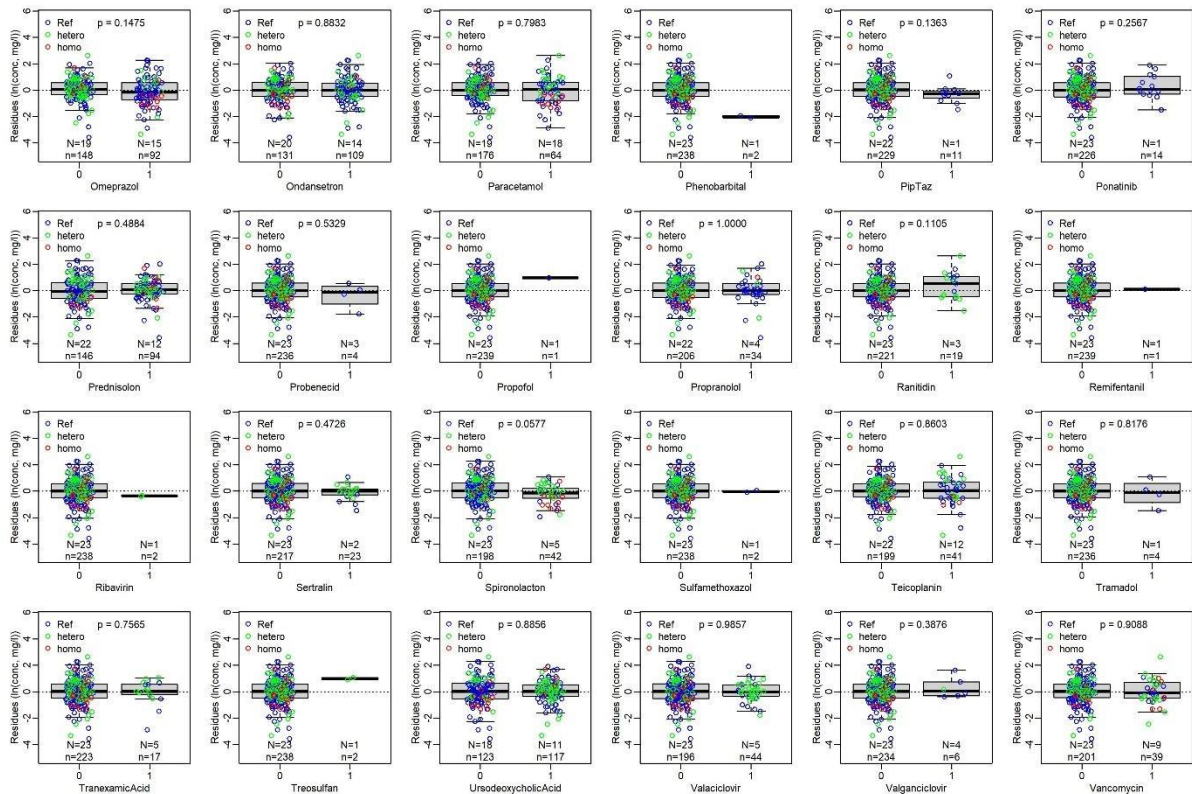

**Figure S10.** Residuals from the final model plotted *versus* co-medication. Colors, as in Supplementary Figure S3.

**Table S1.** Final model after exclusion of the two carriers of a CYP2C19rs4986893 or CYP3A4rs35599367 variant gene.

| Parameter                                             | Reference value for intercept        | Fit effect | SE     | p                 |
|-------------------------------------------------------|--------------------------------------|------------|--------|-------------------|
| <b>Fixed effects</b>                                  |                                      |            |        |                   |
| $\theta$ , Intercept (log( $C_{trough}$ ))            |                                      | -2.6100    | 0.5293 | <10 <sup>-5</sup> |
| $\theta$ , ln(dose/weight, mg/kg)                     | n.a.                                 | 1.0460     | 0.2171 | <10 <sup>-5</sup> |
| $\theta$ , $\Delta$ ln(surface area, m <sup>2</sup> ) | ln(1 m <sup>2</sup> )                | 1.2889     | 0.3049 | 0.00071           |
| $\theta$ , ciprofloxacin                              | No ciprofloxacin                     | -0.8654    | 0.3024 | 0.0047            |
| $\theta$ , levetiracetam                              | No levetiracetam                     | -0.9553    | 0.3446 | 0.0084            |
| $\theta$ , propranolol                                | No propranolol                       | -0.5368    | 0.2883 | 0.064             |
| $\theta$ , metamizole                                 | No metamizole                        | -0.2935    | 0.1653 | 0.077             |
| $\theta$ , ABCC2 rs2273697                            | $\theta$ , ABCC2 rs2273697 GG        | -0.6082    | 0.2515 | 0.042             |
| $\theta$ , ABCC2 rs717620                             | $\theta$ , ABCC2 rs717620 CC         | 0.5499     | 0.2625 | 0.058             |
| $\theta_{10}$ , ABCG2 rs2231142                       | $\theta_{10}$ , ABCG2 rs2231142 CC   | 0.6087     | 0.2166 | 0.029             |
| $\theta_{11}$ , CYP2C19 rs4244285                     | $\theta_{11}$ , CYP2C19 rs4244285 GG | 1.0437     | 0.2536 | 0.0010            |
| $\theta_{14}$ , metamizole × CYP2C19 rs4244285        | No metamizole, CYP2C19 rs4244285 GG  | -0.4173    | 0.2193 | 0.058             |
| <b>Random effects distribution (SD)</b>               |                                      |            |        |                   |
| ID intercept, 0.3423; Residuals, 0.8782               |                                      |            |        |                   |

**Table S2.** Final model, but without the metamizole×CYP2C19rs4244285 interaction.

| Parameter                                            | Reference value for intercept | Fit effect | SE     | <i>p</i>          |
|------------------------------------------------------|-------------------------------|------------|--------|-------------------|
| <b>Fixed effects</b>                                 |                               |            |        |                   |
| $\theta_1$ , Intercept ( $\log(C_{\text{trough}})$ ) |                               | -2.0477    | 0.4755 | <10 <sup>-4</sup> |
| $\theta_2$ , $\ln(\text{dose/weight, mg/kg})$        | n.a.                          | 0.8566     | 0.1984 | <10 <sup>-4</sup> |
| $\theta_3$ , $\Delta \ln(\text{surface area, m}^2)$  | $\ln(1 \text{ m}^2)$          | 1.0902     | 0.2417 | <10 <sup>-4</sup> |
| $\theta_4$ , ciprofloxacin                           | No ciprofloxacin              | -1.0782    | 0.2964 | 0.0034            |
| $\theta_5$ , levetiracetam                           | No levetiracetam              | -0.8887    | 0.2890 | 0.0023            |
| $\theta_6$ , propranolol                             | No propranolol                | -0.5694    | 0.2733 | 0.038             |
| $\theta_8$ , ABCC2 rs2273697                         | ABCC2 rs2273697 GG            | -0.7527    | 0.1691 | <10 <sup>-4</sup> |
| $\theta_9$ , ABCC2 rs717620                          | ABCC2 rs717620 CC             | 0.5188     | 0.1929 | 0.0077            |
| $\theta_{10}$ , ABCG2 rs2231142                      | ABCG2 rs2231142 CC            | 0.4543     | 0.1416 | 0.0015            |
| $\theta_{11}$ , CYP2C19 rs4244285                    | CYP2C19 rs4244285 GG          | 0.5802     | 0.1571 | 0.00027           |
| $\theta_{12}$ , CYP2C19 rs4986893                    | CYP2C19 rs4986893 GG          | 1.5350     | 0.4373 | 0.00056           |
| $\theta_{13}$ , CYP3A4 rs35599367                    | CYP3A4 rs35599367 CC          | 3.2609     | 0.6327 | <10 <sup>-6</sup> |
| <b>Random effects distribution (SD)</b>              |                               |            |        |                   |
| ID intercept, n.a.; Residuals, 0.9628                |                               |            |        |                   |

n.a., not applicable (see main text)

**Table S3.** Final model, but without effects for co-medication.

| Parameter                                            | Reference value for intercept | Fit effect | SE     | <i>p</i>          |
|------------------------------------------------------|-------------------------------|------------|--------|-------------------|
| <b>Fixed effects</b>                                 |                               |            |        |                   |
| $\theta_1$ , Intercept ( $\log(C_{\text{trough}})$ ) |                               | -2.4986    | 0.5802 | <10 <sup>-4</sup> |
| $\theta_2$ , $\ln(\text{dose/weight, mg/kg})$        | n.a.                          | 0.8581     | 0.2304 | 0.00026           |
| $\theta_3$ , $\Delta \ln(\text{surface area, m}^2)$  | $\ln(1 \text{ m}^2)$          | 1.4067     | 0.3261 | 0.00035           |
| $\theta_8$ , ABCC2 rs2273697                         | ABCC2 rs2273697 GG            | -0.5329    | 0.2913 | 0.094             |
| $\theta_9$ , ABCC2 rs717620                          | ABCC2 rs717620 CC             | 0.6452     | 0.3075 | 0.049             |
| $\theta_{10}$ , ABCG2 rs2231142                      | ABCG2 rs2231142 CC            | 0.6628     | 0.2508 | 0.027             |
| $\theta_{11}$ , CYP2C19 rs4244285                    | CYP2C19 rs4244285 GG          | 0.5099     | 0.2458 | 0.064             |
| $\theta_{12}$ , CYP2C19 rs4986893                    | CYP2C19 rs4986893 GG          | 1.4170     | 0.6322 | 0.0496            |
| $\theta_{13}$ , CYP3A4 rs35599367                    | CYP3A4 rs35599367 CC          | 2.8894     | 0.6327 | 0.0012            |
| <b>Random effects distribution (SD)</b>              |                               |            |        |                   |
| ID intercept, 0.4501; Residuals, 0.9542              |                               |            |        |                   |
